# Supplementary material
Source: Springer Nature journal article supplement (https://www.springermedizin.de/resource/supplementary/12916_2006_111_MOESM2_ESM.pdf/9599192)

## Review Topics in Maternal Medicine

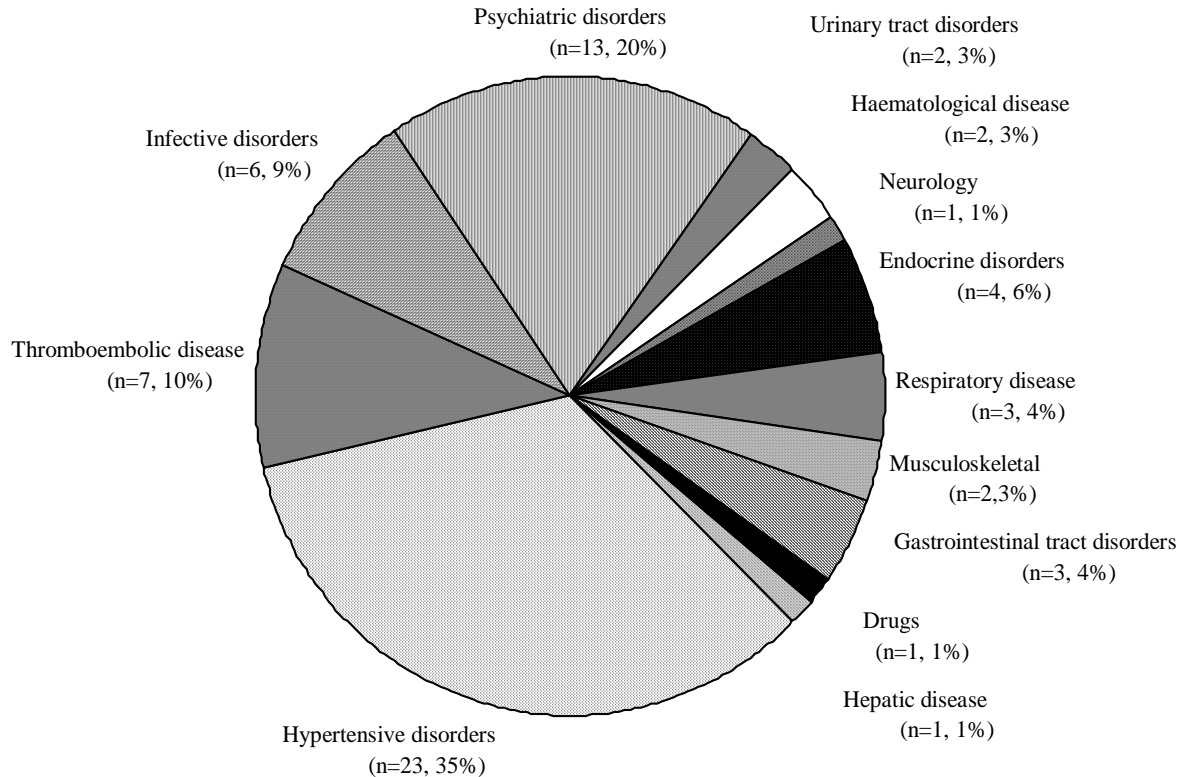

Total number of reviews=68

Supplement: MOESM2 [file 9599192]
